# Supplementary material for: Identification of Senescence‐Associated Biomarkers in Diabetic Glomerulopathy Using Integrated Bioinformatics Analysis
Source: Hindawi journal article supplement (doi:10.1155/2024/5560922), 2024-01-01

Tag

A

GO enrichment analysis (BP)

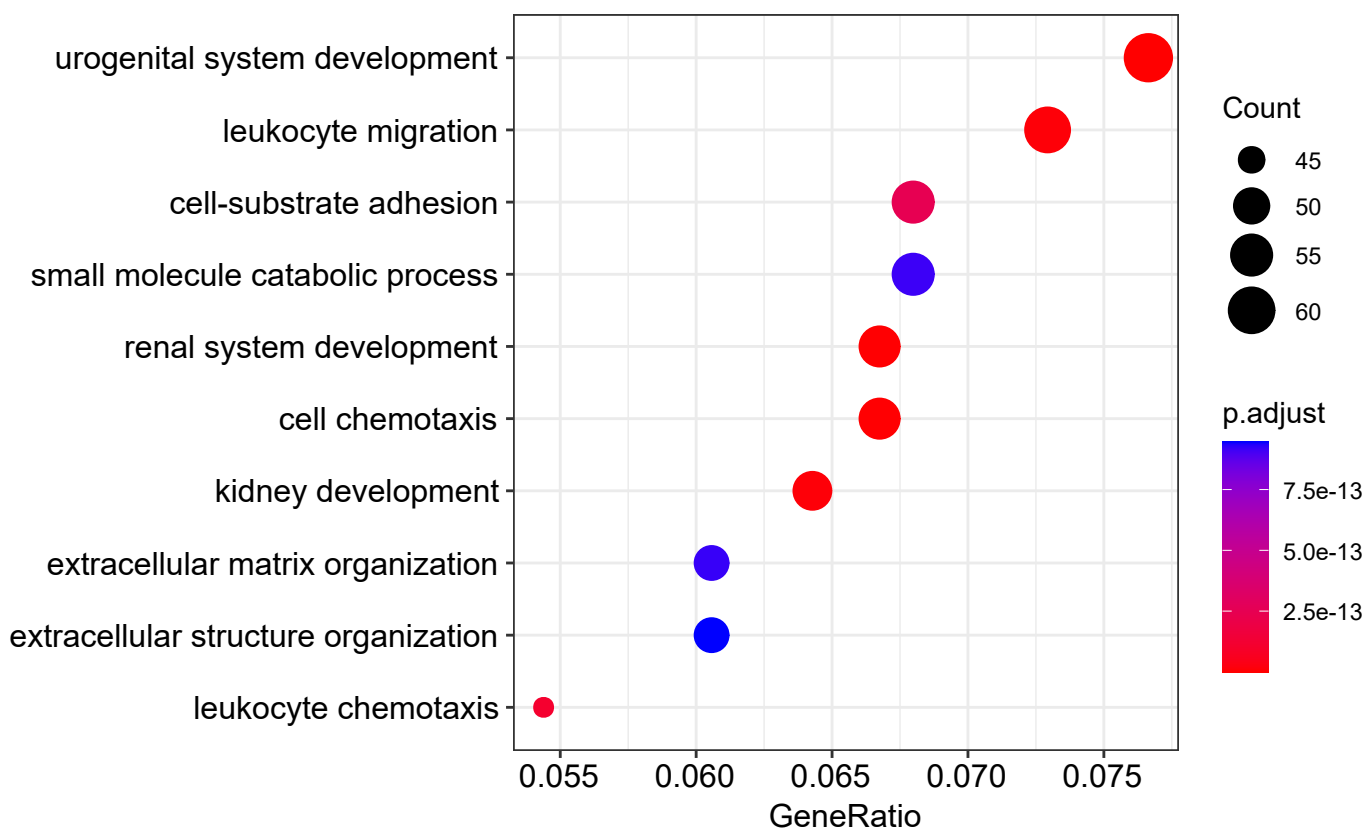

B

GO enrichment analysis (CC)

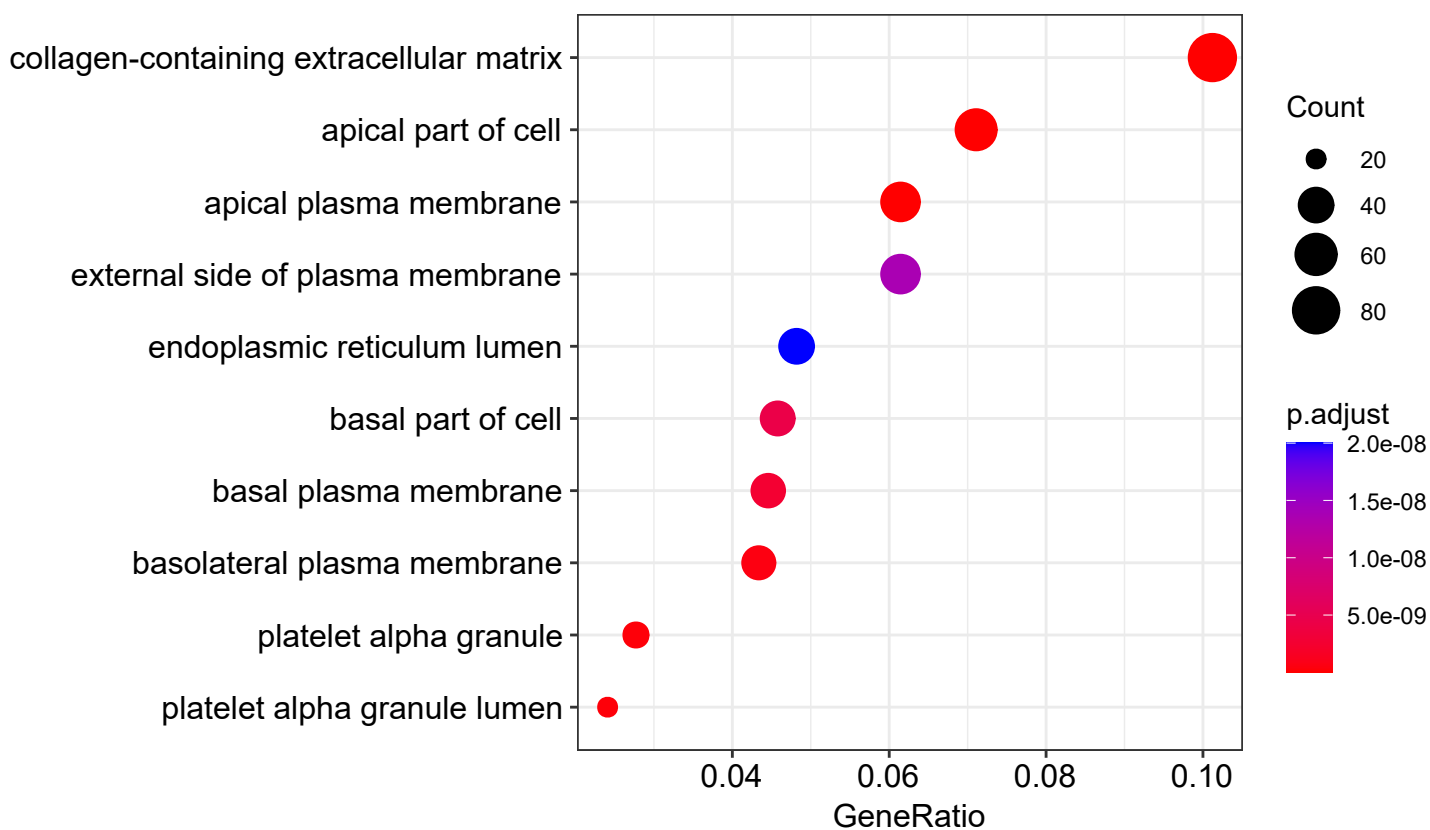

C

GO enrichment analysis (MF)

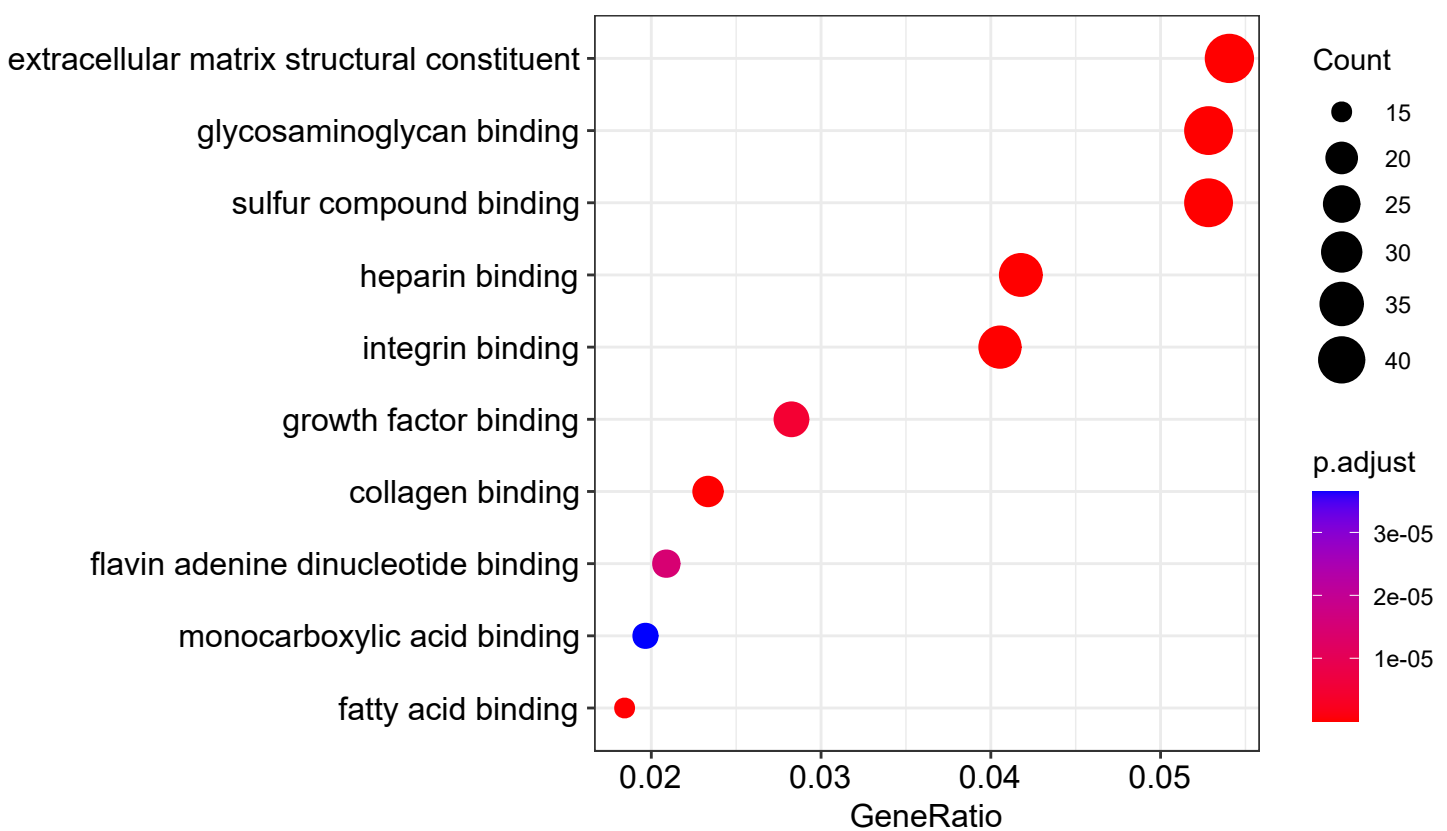

Supplement: f1 [file 5560922.f1.pdf]
